# Supplementary material for: Boron bridging of rhamnogalacturonan‐II is promoted in vitro by cationic chaperones, including polyhistidine and wall glycoproteins
Source: PubMed Central journal article supplement (PMC4973674; doi:10.1111/nph.13596), 2015-08-24
Supplement: NPH-209-241-s001.pdf [file NPH-209-241-s001.pdf]

## Supporting Information Fig. S1

Article title: Boron bridging of rhamnogalacturonan-II is promoted *in vitro* by cationic chaperones, including polyhistidine and wall glycoproteins

Authors: Dimitra Chormova and Stephen C. Fry

Article acceptance date: 25 June 2015

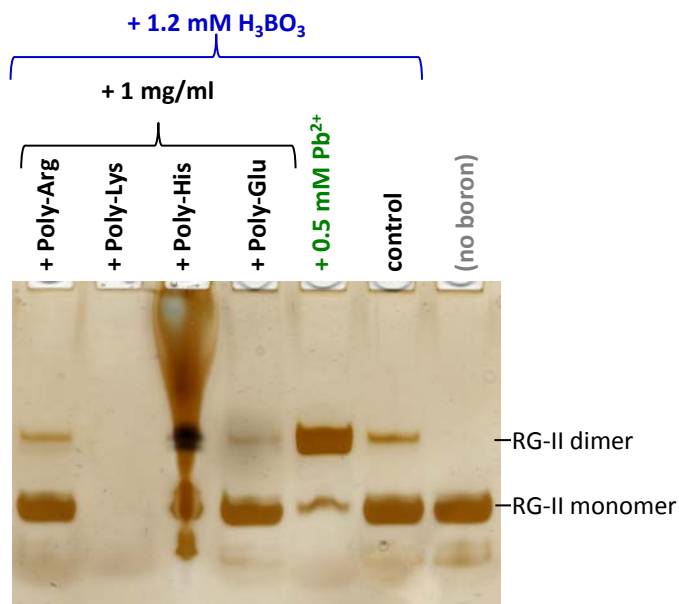

**Fig. S1** Some polyamino acids affect RG-II dimerisation. Monomeric RG-II ( $0.1 \text{ mg ml}^{-1}$ ;  $20 \mu\text{M}$ ) was incubated for 24 h with the additives indicated. Other details as in Fig. 2.
